# Supplementary material
Source: PubMed Central journal article supplement (PMC3809888)

# Figure S1

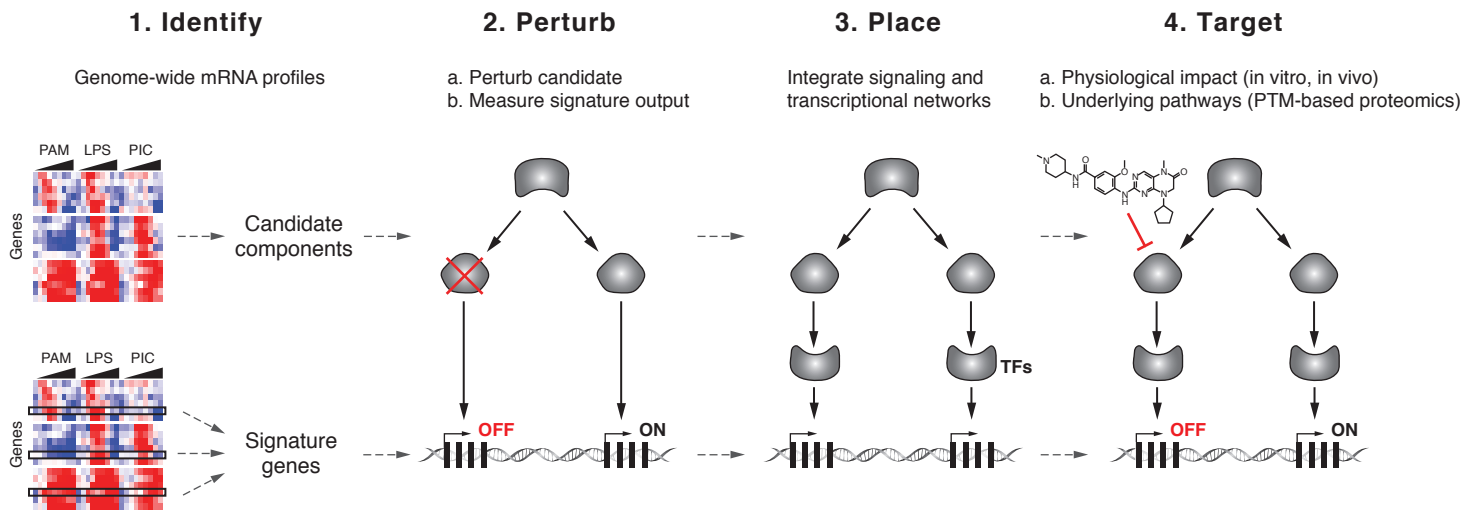

Supplement: NIHMS350287-supplement-Fig_S1.pdf [file NIHMS350287-supplement-Fig_S1.pdf]

**Figure S2**

**A**

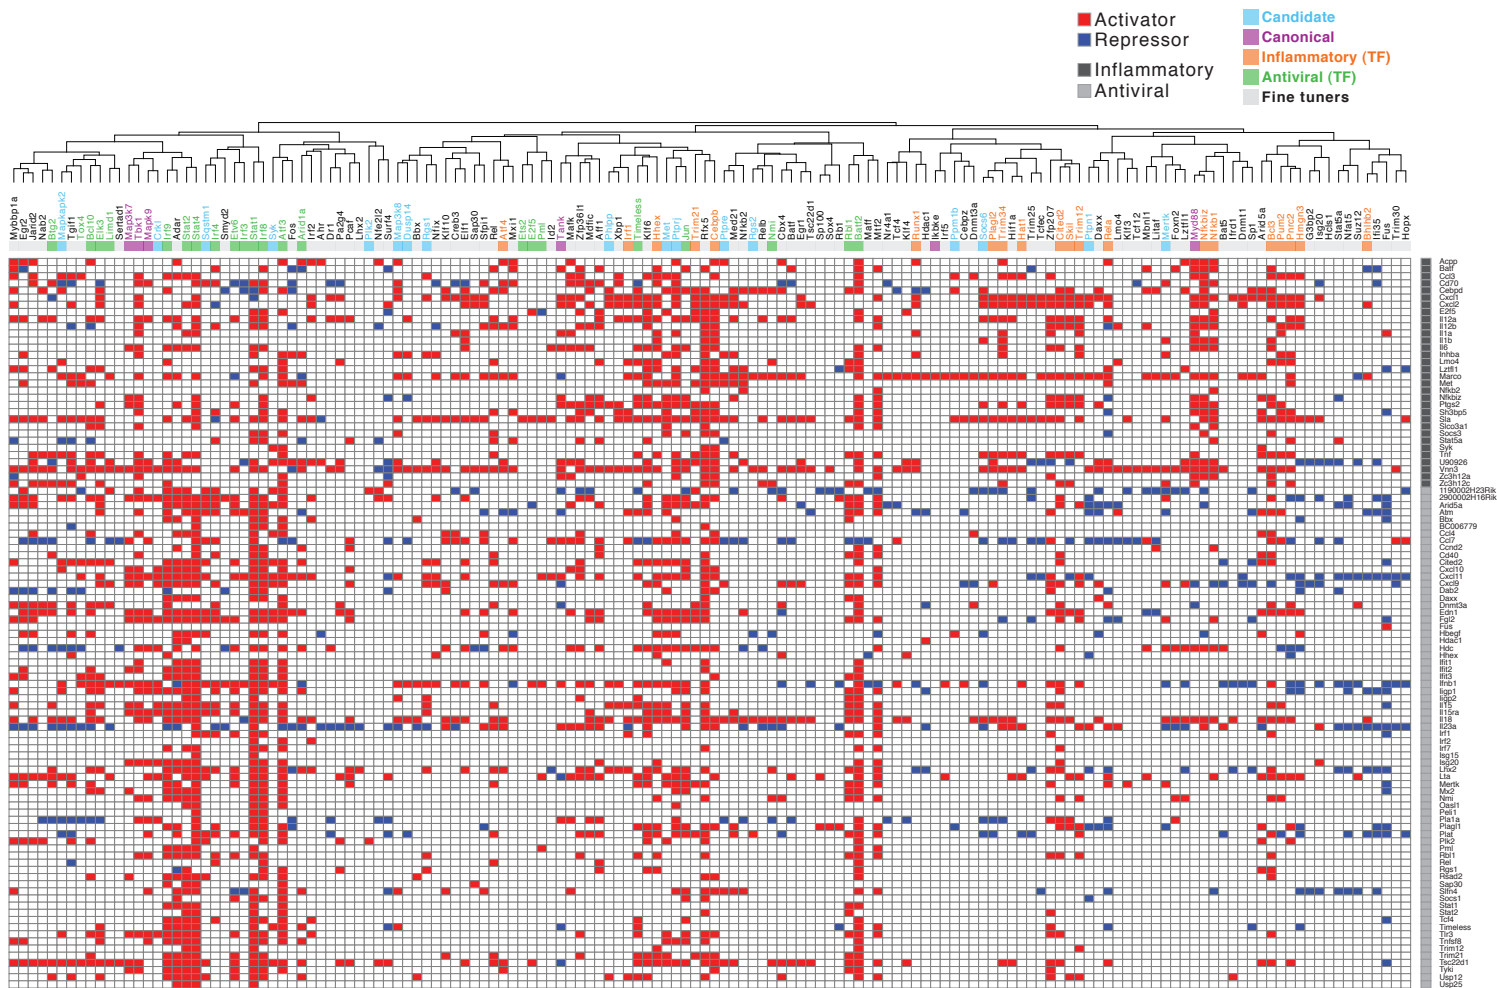

**B**

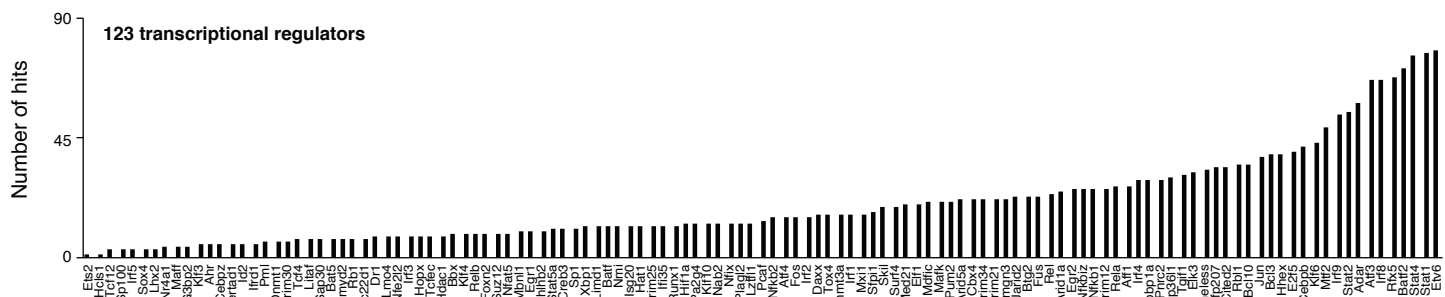

**C**

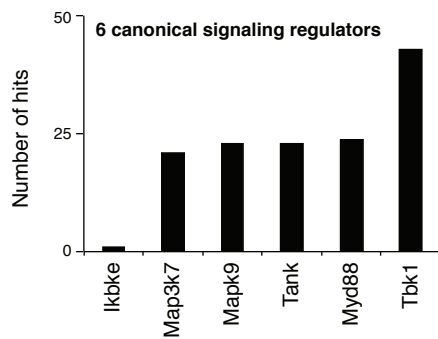

**D**

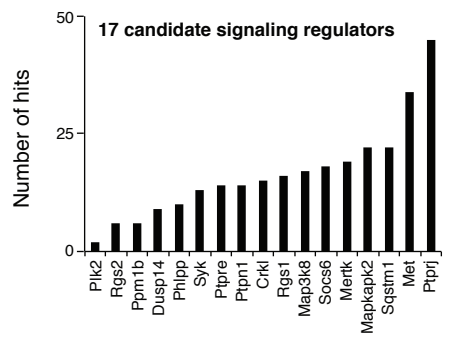

**E**

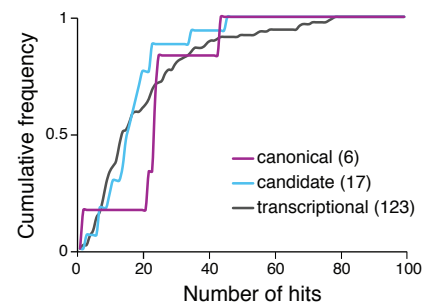

Supplement: NIHMS350287-supplement-Fig_S2.pdf [file NIHMS350287-supplement-Fig_S2.pdf]

Figure S3

**A**

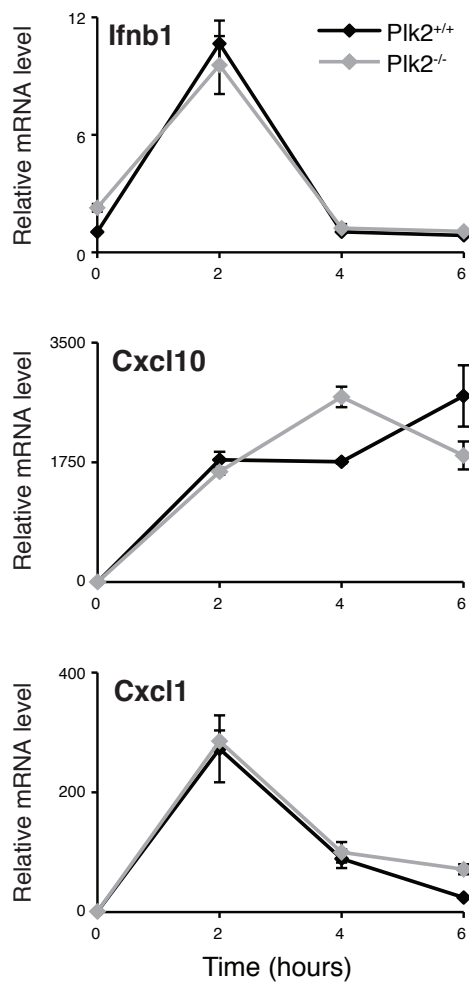

**B**

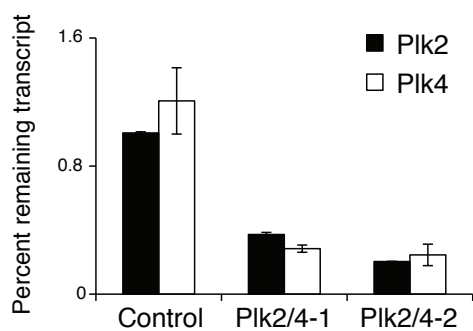

**C**

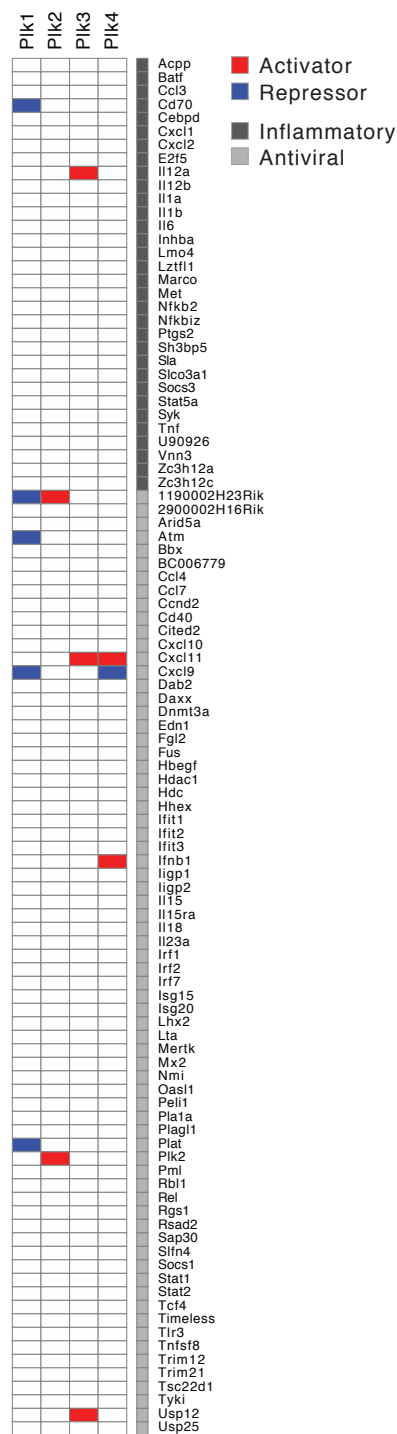

Supplement: NIHMS350287-supplement-Fig_S3.pdf [file NIHMS350287-supplement-Fig_S3.pdf]

**Figure S4**

**A**

**Canonical pathways**

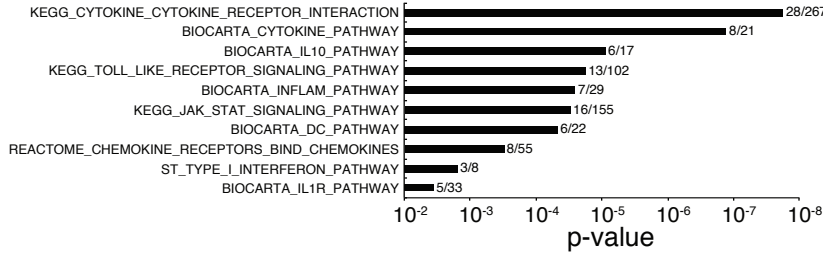

**GO processes**

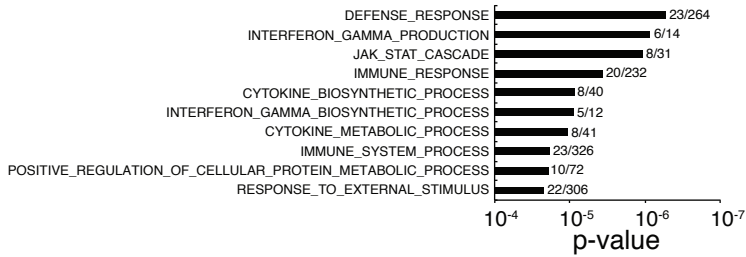

**B**

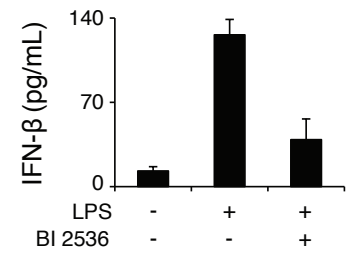

**D**

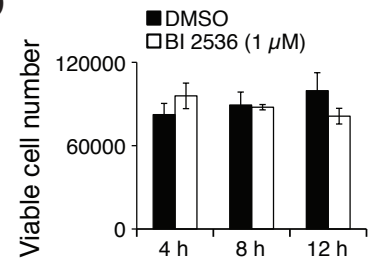

**C**

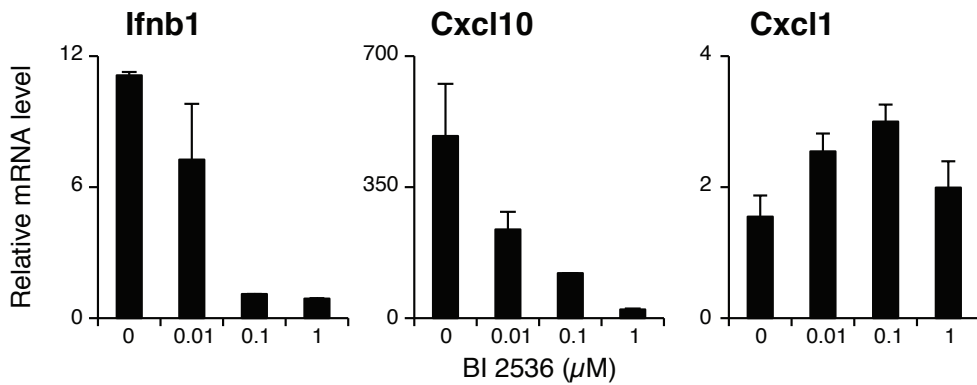

**E**

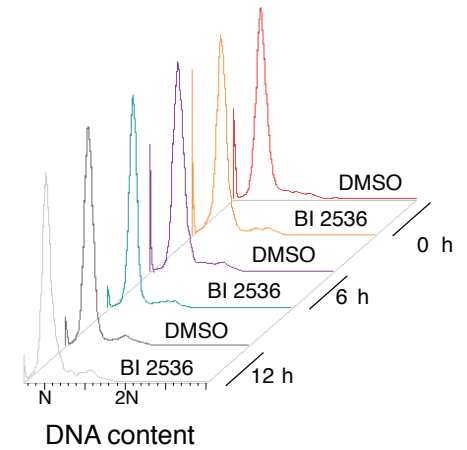

**F**

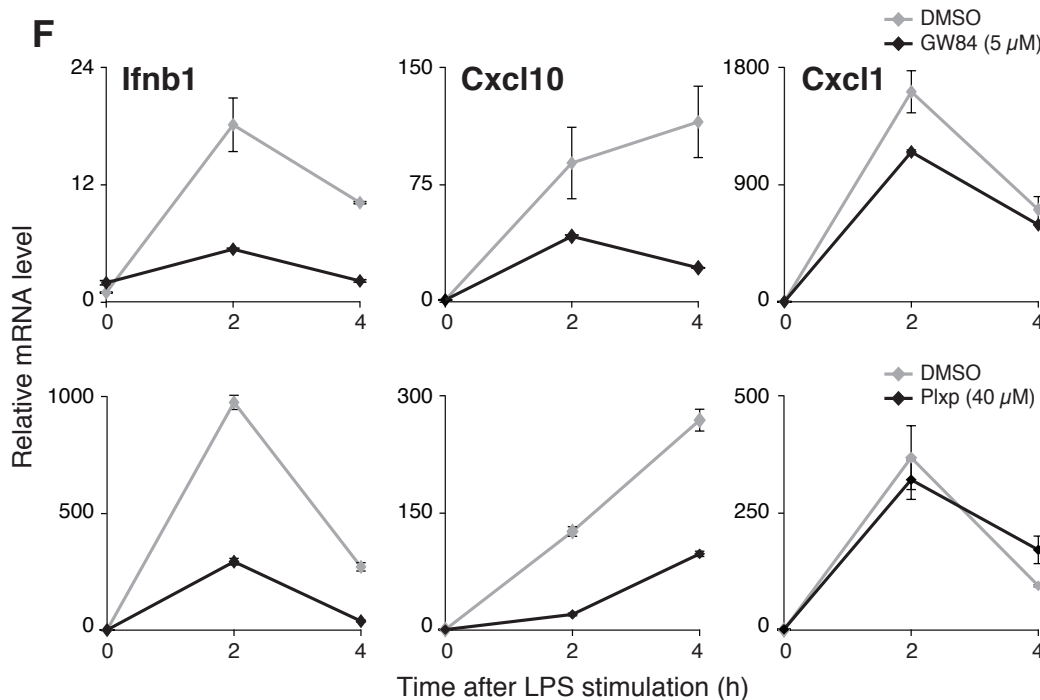

**G**

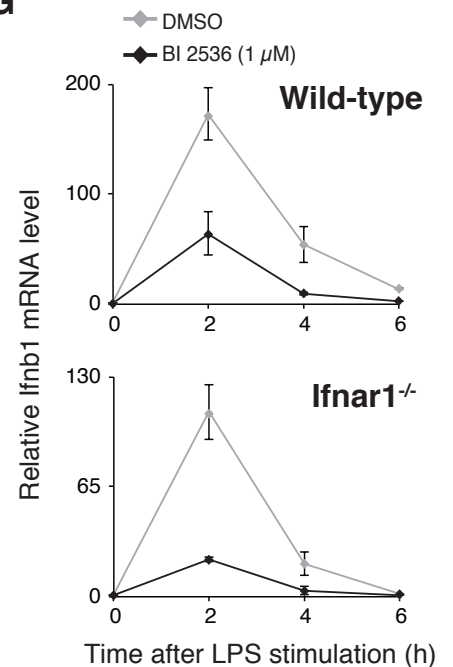

Supplement: NIHMS350287-supplement-Fig_S4.pdf [file NIHMS350287-supplement-Fig_S4.pdf]

# Figure S5

**A**

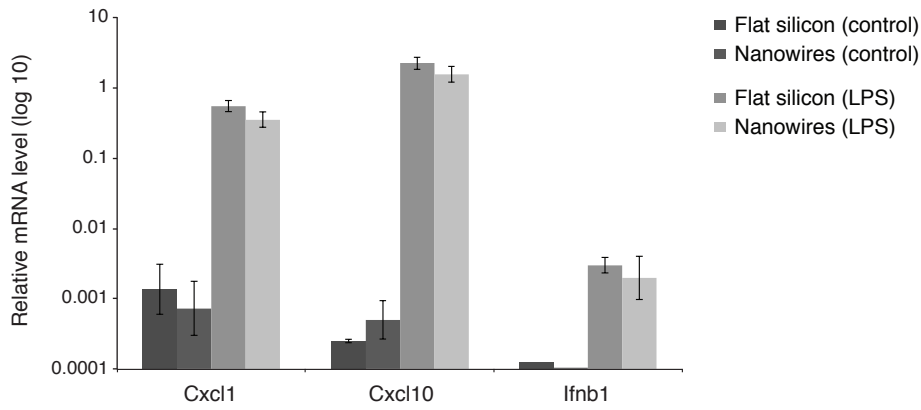

**B**

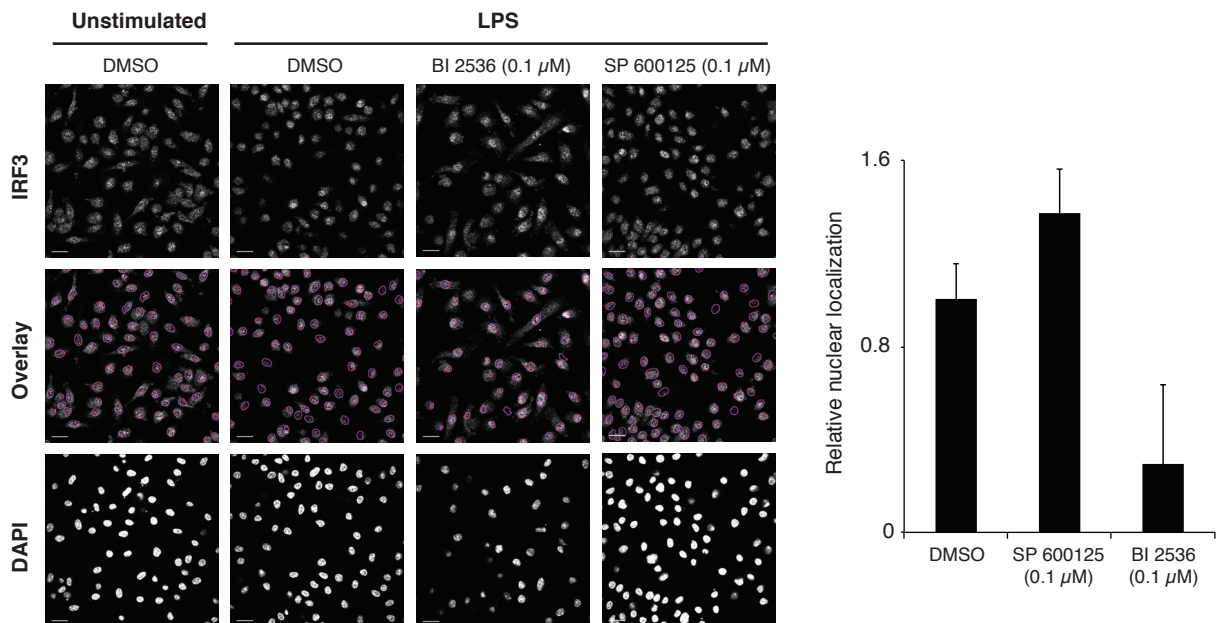

**C**

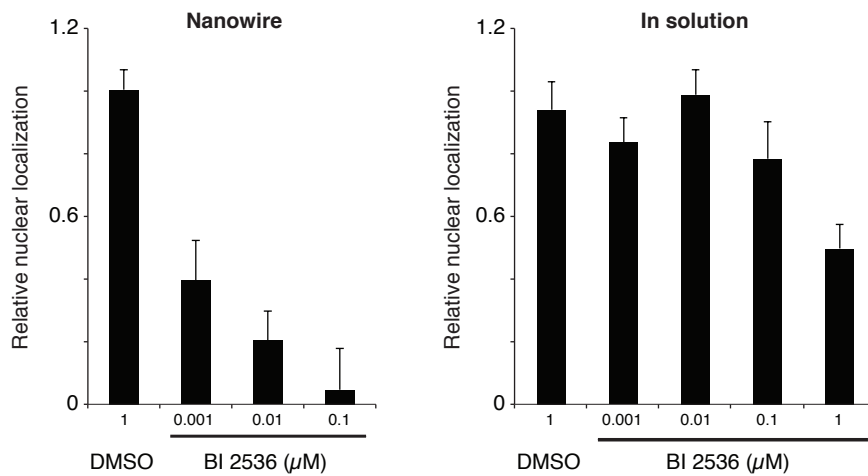

Supplement: NIHMS350287-supplement-Fig_S5.pdf [file NIHMS350287-supplement-Fig_S5.pdf]

**Figure S6**

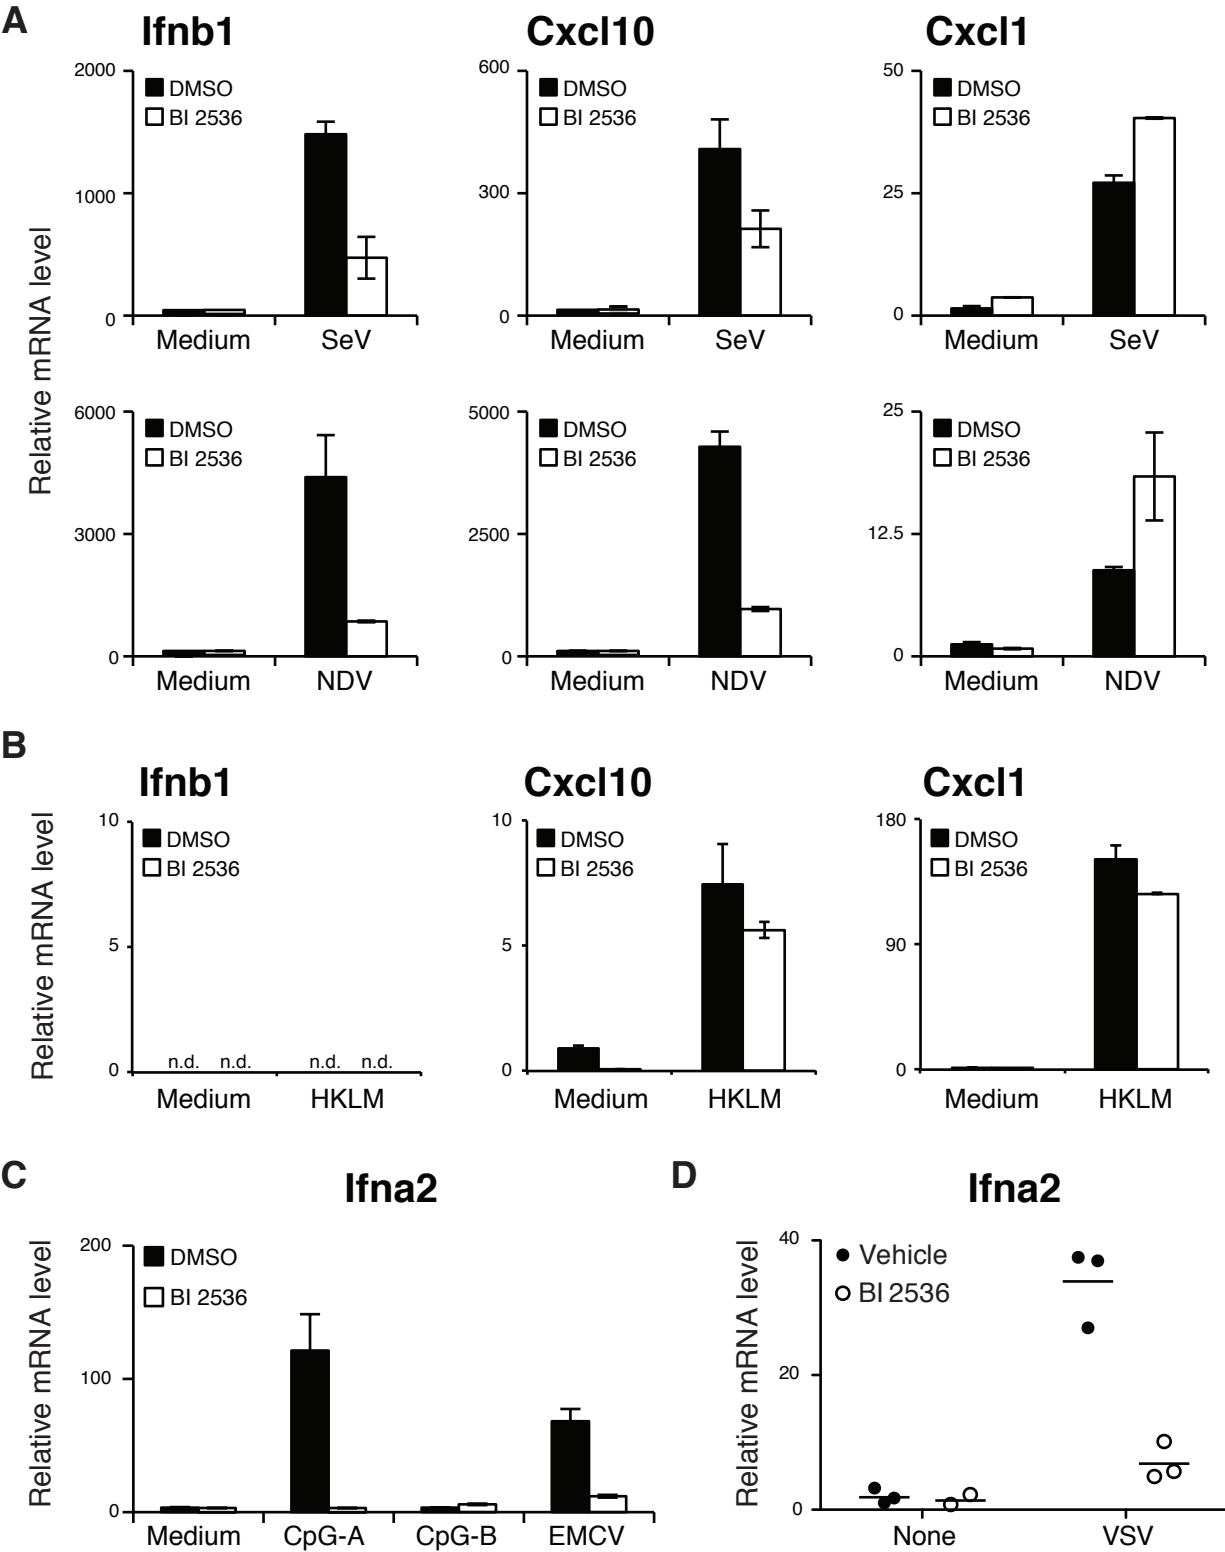

Supplement: NIHMS350287-supplement-Fig_S6.pdf [file NIHMS350287-supplement-Fig_S6.pdf]

**Figure S7**

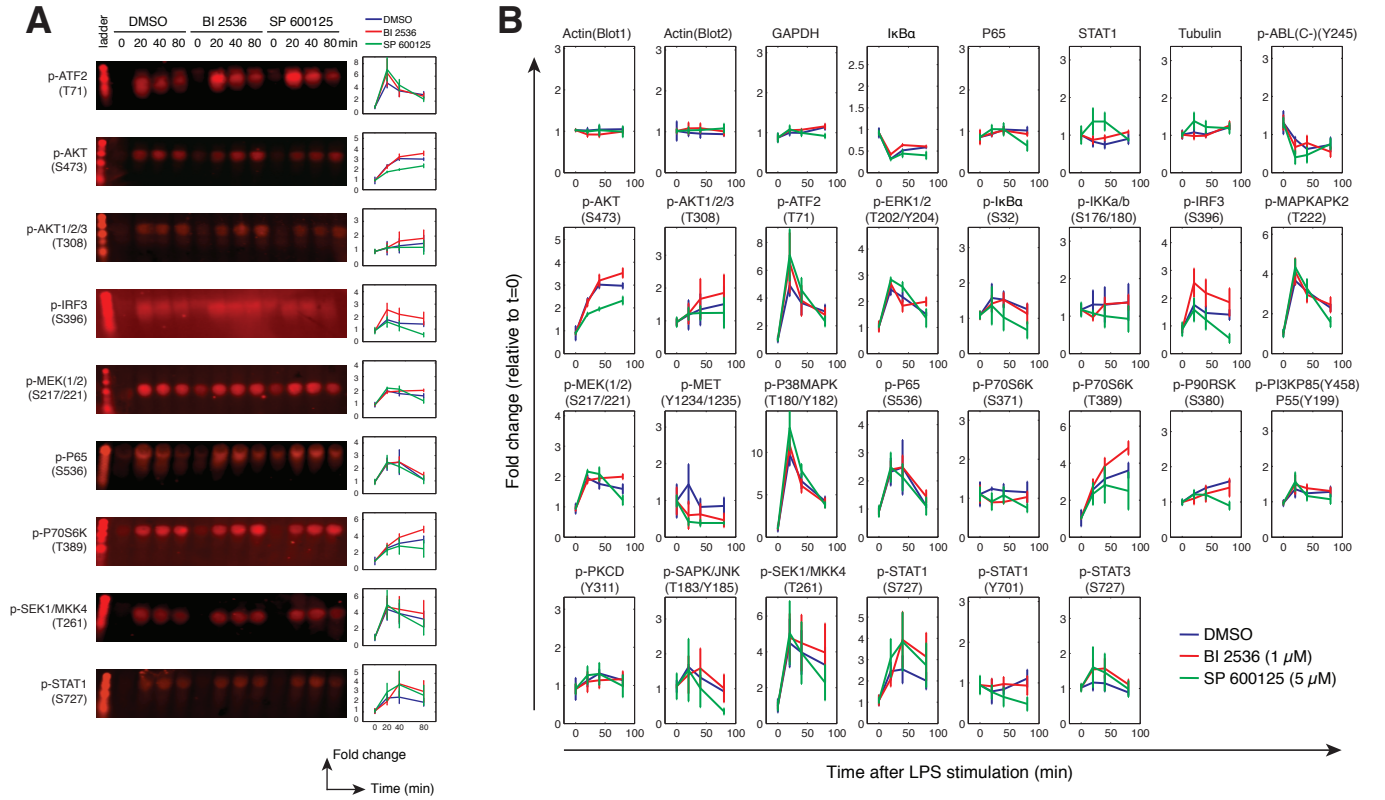

Supplement: NIHMS350287-supplement-Fig_S7.pdf [file NIHMS350287-supplement-Fig_S7.pdf]
